# Supplementary material for: HIV‐1 drug resistance among individuals who seroconverted in the ASPIRE dapivirine ring trial
Source: PubMed Central journal article supplement (PMC8583424; doi:10.1002/jia2.25833), 2021-11-11
Supplement: JIA2-24-e25833-s001.pdf [file JIA2-24-e25833-s001.pdf]

**Table S1. Ethics Committee/Review Board Approvals for the MTN-020/ASPIRE Protocol by Clinical Research Site**

| <b>Country</b>      | <b>Clinical Research Site</b>                                                      | <b>Name of Ethics Committee/Review Board</b>                                                                                                   |
|---------------------|------------------------------------------------------------------------------------|------------------------------------------------------------------------------------------------------------------------------------------------|
| <b>Malawi</b>       | Blantyre                                                                           | National Health Sciences Research Committee of Malawi<br>Johns Hopkins University Bloomberg School of Public Health Institutional Review Board |
|                     | Lilongwe                                                                           | National Health Sciences Research Committee of Malawi<br>University of North Carolina at Chapel Hill Institutional Review Board                |
| <b>South Africa</b> | Cape Town                                                                          | University of Cape Town: Human Research Ethics Committee                                                                                       |
|                     | Durban (eThekweni, Botha's Hill, Chatsworth, Isipingo, Tongaat, Umkomaas, Verulum) | Biomedical Research Ethics Committee, University of KwaZulu-Natal                                                                              |
|                     | Johannesburg                                                                       | Wits Human Research Ethics Committee, University of Witwatersrand                                                                              |
| <b>Uganda</b>       | Kampala                                                                            | Joint Clinical Research Centre Institutional Review Board<br>Johns Hopkins University School of Medicine Institutional Review Board            |
| <b>Zimbabwe</b>     | Chitungwiza – Seke South<br>Chitungwiza – Zengeza<br>Harare- Spilhaus              | Medical Research Council of Zimbabwe<br>Committee on Human Research, University of California - San Francisco                                  |
